# Supplementary figures and images for: Reducing hospital acquired pressure ulcers in intensive care
Source: PubMed Central journal article supplement — BMJ Qual Improv Rep. 2015 Jun 8;4(1):u205599.w3015. doi: 10.1136/bmjquality.u205599.w3015 (PMC4645929; doi:10.1136/bmjquality.u205599.w3015), 2015-06-08

# January - December pressure ulcer statistics 2013: post PDCA project

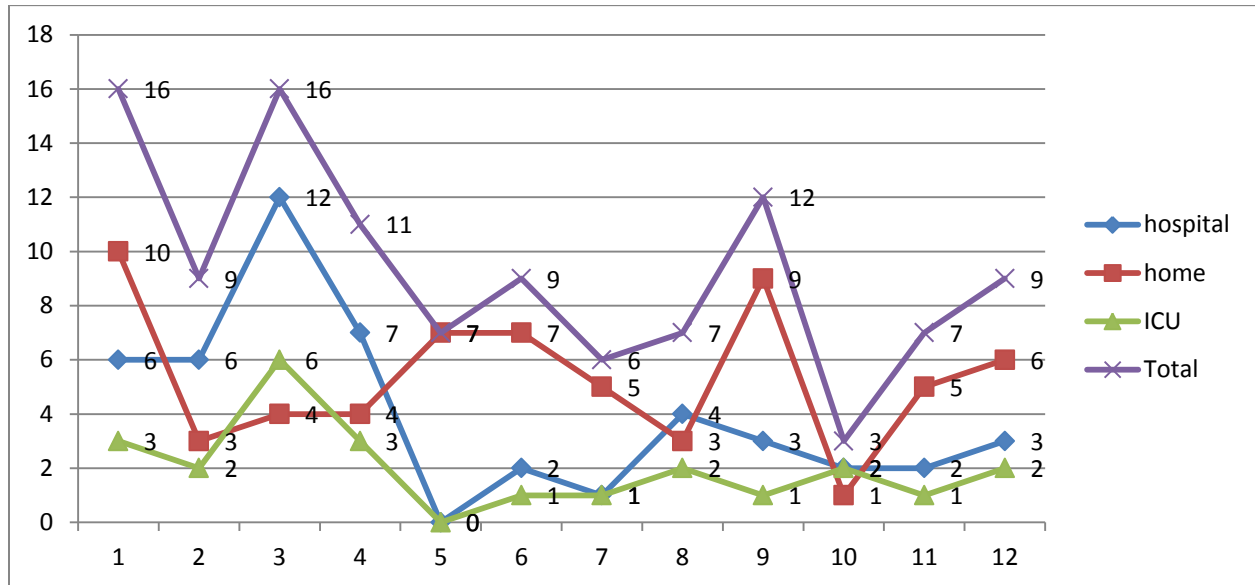

Supplement: bmjqir-4-u205599-w3015-s1.pdf [file bmjqir-4-u205599-w3015-s1.pdf]

January - March pressure ulcer statistics 2013: pre PDCA

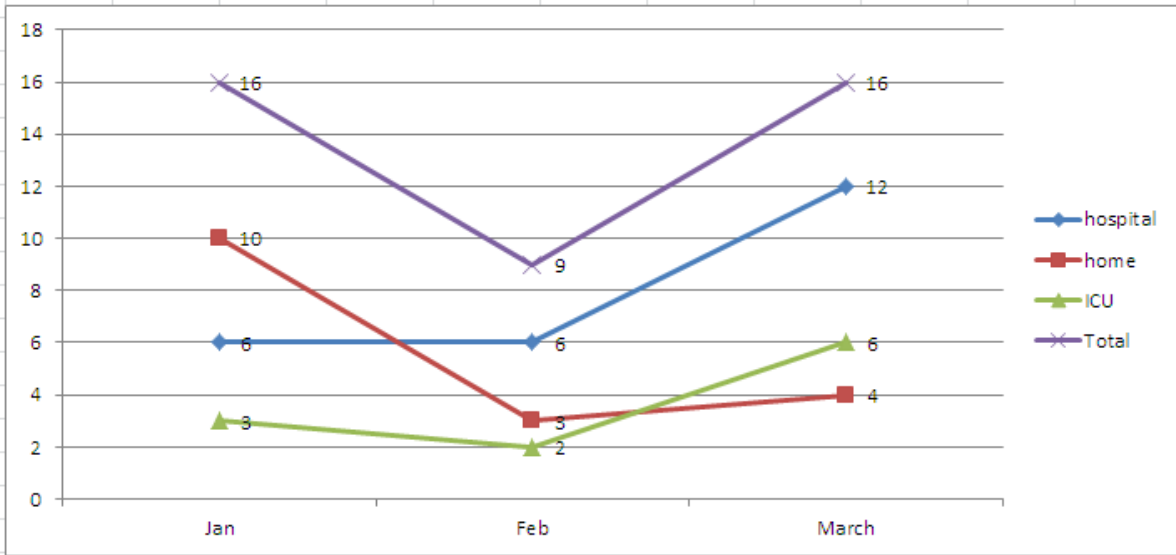

Supplement: bmjqir-4-u205599-w3015-s2.pdf [file bmjqir-4-u205599-w3015-s2.pdf]
